# Supplementary material for: Magnaporthe oryzae effector MoSPAB1 directly activates rice Bsr-d1 expression to facilitate pathogenesis
Source: PubMed Central journal article supplement (PMC10728069; doi:10.1038/s41467-023-44197-9), 2023-12-18
Supplement: 41467_2023_44197_MOESM1_ESM.pdf [file 41467_2023_44197_MOESM1_ESM.pdf]

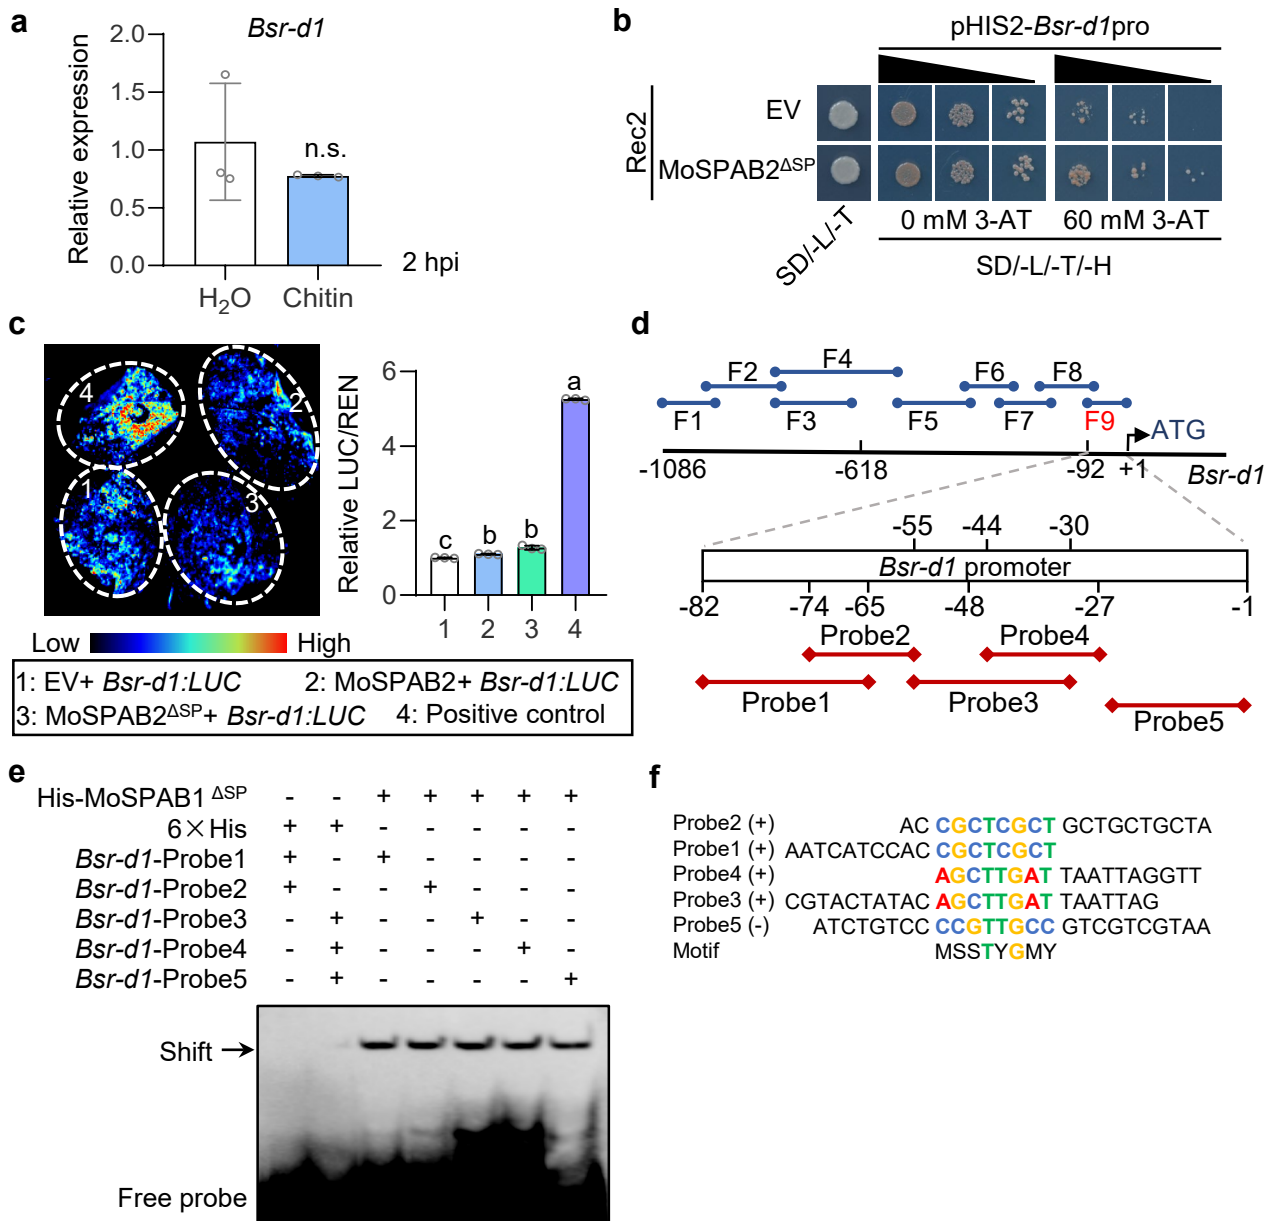

### Supplementary Fig. 1 Identification of upstream regulators of *Bsr-d1* derived from *M. oryzae*.

**a** Expression level of *Bsr-d1* 2 hr post chitin treatment. *OsUbg5* was used as an internal control. Values are mean  $\pm$  SD, n=3 biologically independent samples (Student's two-sided *t*-test, n.s. indicates no significance). Source data are provided as a Source Data file.

**b** Determination of MoSPAB2<sup>ΔSP</sup> binding to the *Bsr-d1* promoter in a yeast one-hybrid assay. The *Bsr-d1* promoter was fused to the HIS2 reporter and MoSPAB2<sup>ΔSP</sup> to GAL4 AD. Yeast cells transformed with the reporter and an effector construct with or without MoSPAB2<sup>ΔSP</sup>. The SD/-Leu/-Trp/-His medium with 60 mM 3-amino-1,2,4-triazole (3-AT) was used to test for HIS2 expression.

**c** Activation of the *Bsr-d1* promoter by MoSPAB2 in luciferase assay using *N. benthamiana*. Luciferase signals were imaged (left panel) and measured (right panel) using a dual-LUC assay 48 hr after infiltration. The positive control contains transcription factor EAT1 and *OsLTPL94* promoter driving reporter. EV contains 35S:YFP as the negative control. LUC activities were normalized to REN. Values are mean  $\pm$  SD, n = 3 samples (one-way ANOVA with Dunnett T3's test, *P* values are shown in the Source Data file). Different letters indicate significant differences (*P* < 0.05). Source data are provided as a Source Data file. Similar results are obtained from three independent biological experiments.

**d** A schematic diagram of the DNA fragments and probes used for DAP-qPCR and EMSA. The DNA fragments (F1-F9) for DAP-qPCR are indicated by blue lines. The five probes located in F9 used for EMSA are indicated by red lines.

**e** Binding of MoSPAB1<sup>ΔSP</sup> to probe 1 to probe 5 in EMSA. Locations of the probes are as indicated in (D); sequences of the five probes are listed in supplementary table 2. Each probe was labeled with biotin at the 5' end. 6×His was used as a negative control. Similar results are obtained from two independent biological experiments.

**f** A conserved motif deduced from the probes bound by MoSPAB1 using the MEME suite version 5.4.1. The conserved bases are displayed in colors. M: A/C, Y: C/T.

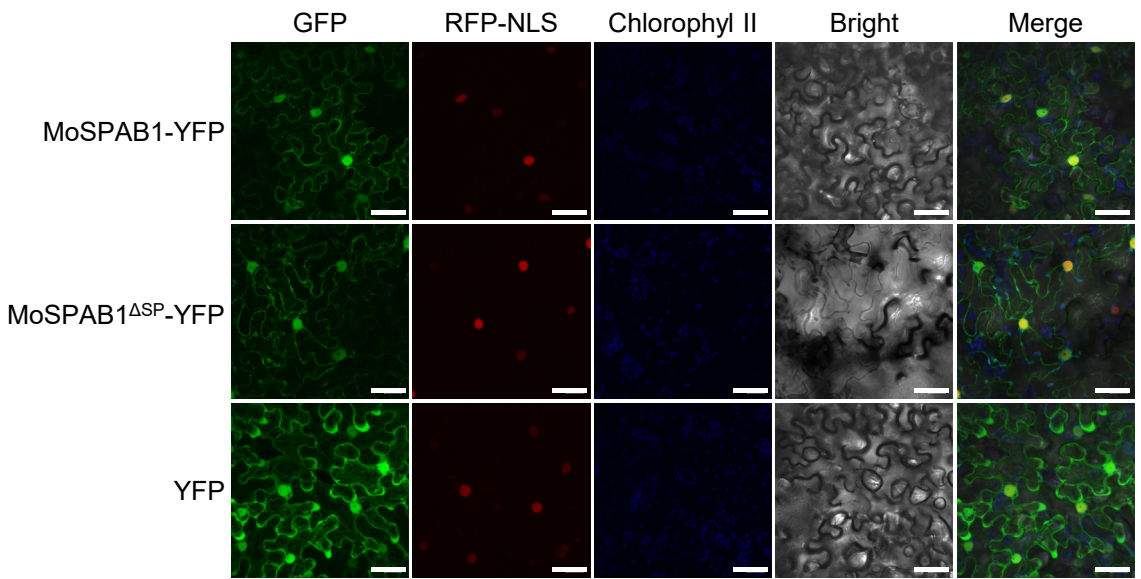

**Supplementary Fig. 2 Localization of MoSPAB1-YFP and MoSPAB1<sup>ASP</sup>-YFP in mesophyll cells of *N. benthamiana* leaves.** The 35S:MoSPAB1-YFP, 35S:MoSPAB1<sup>ASP</sup>-YFP, and 35S:YFP constructs were used to infiltrate *N. benthamiana* leaves mediated by *Agrobacterium*. Fluorescence images were observed using confocal microscopy 48 hours post inoculation. RFP-NLS serves as a nuclear marker. Chloroplasts are visualized by chlorophyll II, which is represented by blue pseudocolor. Scale bars, 20  $\mu$ m. Similar results are obtained from two independent biological experiments.

**a**

|            |            |                     |                    |                              |     |
|------------|------------|---------------------|--------------------|------------------------------|-----|
| MLFTPIRSL  | ASLLALASCA | VAQNV <u>K</u> AIYL | <u>F</u> KDVMQSDTH | ALKTSGFDTV                   | 50  |
| LLFRIGILPN | ADLVYYSTGS | DGNPVDWPVV          | TNGSYVGGQA         | LTD <u>K</u> ITSL <u>K</u> T | 100 |
| APTLIERVEV | SLVSHDTTFQ | <u>V</u> IRDRIAADG  | TGASTPLYRA         | FDVLKQTWEL                   | 150 |
| DAFNNDDES  | YHVPSTVDF  | QMLGLMGYKY          | STAPYTNMNF         | WADVQNRINA                   | 200 |
| SVPGLLDRQY | LQVYDGGGAN | NPGTWQTR <u>L</u> G | <u>M</u> KIVPLLWVN | NDYKPDHGNT                   | 250 |
| PAQAQTRFAN | WNSQYNLAGG | GYWNDYDIEK          | LNSSYEGYGG         | ALTSVFGQ                     | 298 |

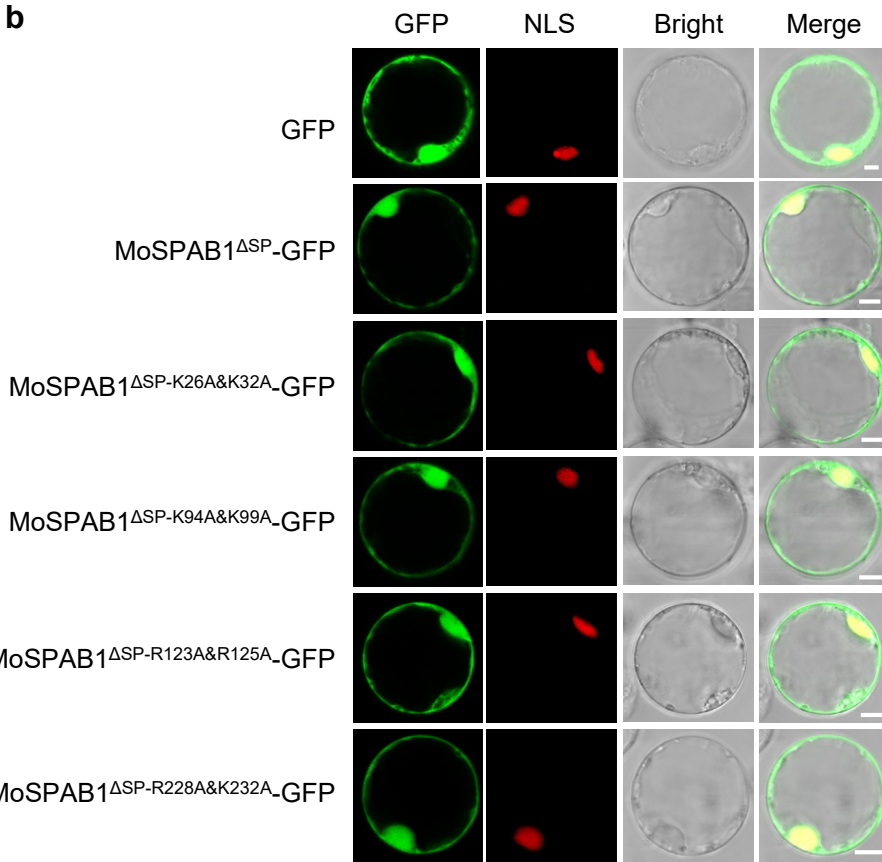

**Supplementary Fig. 3 Analysis of nuclear localization signals of MoSPAB1 and localization of mutant MoSPAB1 in rice protoplasts.**

**a** Analysis of nuclear localization signals of MoSPAB1. The underlined amino acids potentially serve as nuclear localization signals. Key amino acids K and R are highlighted in bold.

**b** Localization of mutant MoSPAB1 in rice protoplasts. The underlined amino acids in bold were changed into alanine (A), individually. MoSPAB1<sup>ΔSP</sup>-GFP, MoSPAB1<sup>K26A&K32A</sup>-GFP, MoSPAB1<sup>K94A&K99A</sup>-GFP, MoSPAB1<sup>R123A&R125A</sup>-GFP, and MoSPAB1<sup>R228A&K232A</sup>-GFP were individually expressed transiently in rice protoplasts for 16 hours. Rice protoplasts were examined under a confocal microscope. NLS in PBI221-H2B-mCherry serves as a nuclear marker. Scale bars, 5 μm. Similar results are obtained from two independent biological experiments.

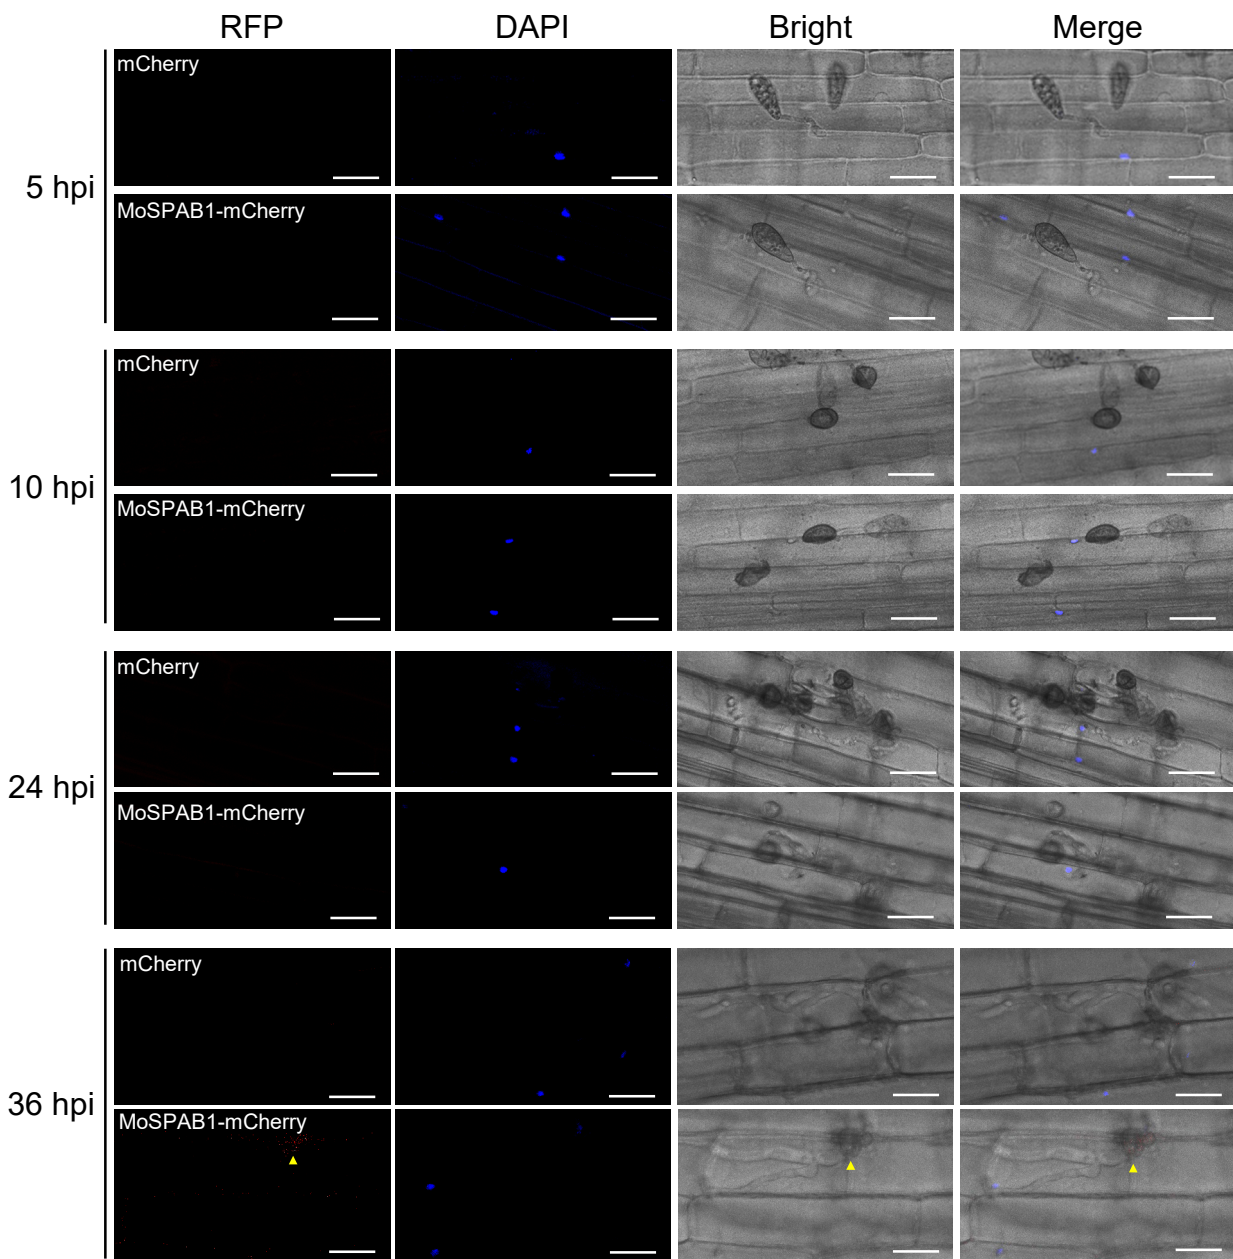

**Supplementary Fig. 4 Development of the *MoSPAB1:MoSPAB1-mCherry* strain on rice leaf sheath.** Rice leaf sheath was inoculated with conidial suspensions of the *MoSPAB1:MoSPAB1-mCherry* (labeled *MoSPAB1-mCherry*) strain and images taken at 5, 10, 24, and 36 hours post inoculation. *MoSPAB1:mCherry* (labeled mCherry) strain is the negative control. Yellow triangles indicate the *MoSPAB1-mCherry* in invasion hyphae. Scale bars, 20  $\mu$ m. Similar results are obtained from two independent biological experiments.

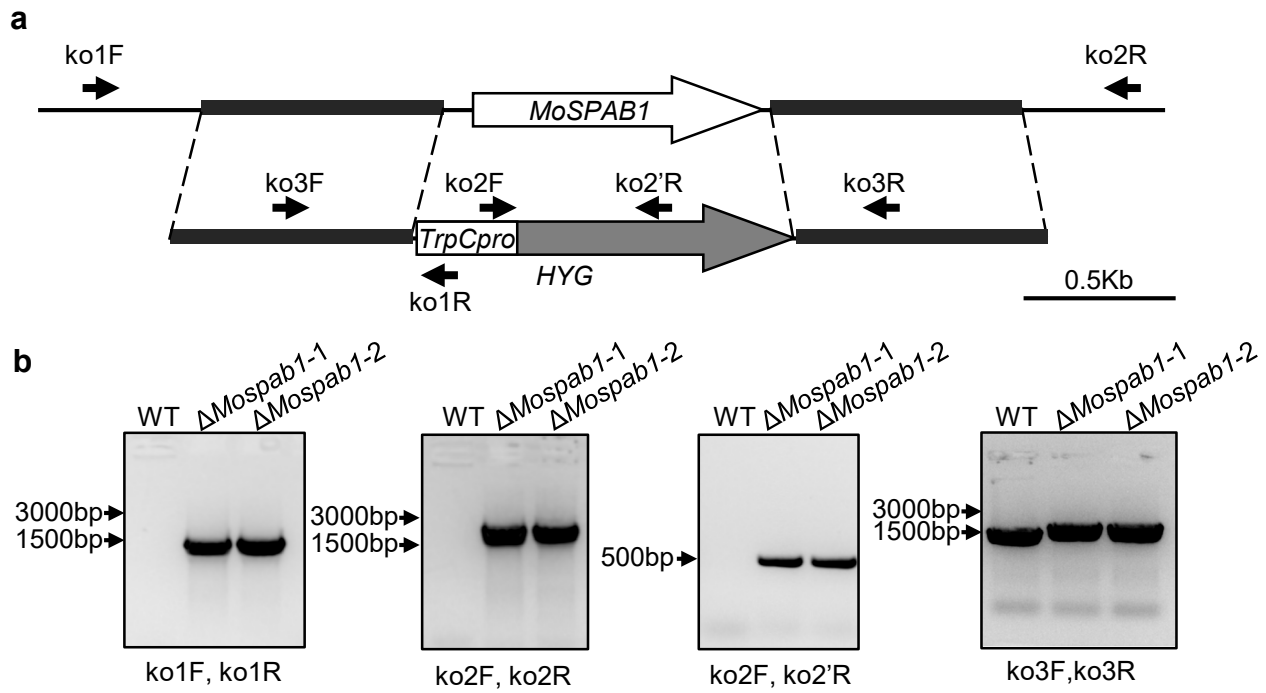

**Supplementary Fig. 5 Generation of the  $\Delta$ *Mospab1* mutant.**

**a** A schematic diagram of targeted deletion of *MoSPAB1* in *M. oryzae*.

**b** DNA gel blot analysis of the  $\Delta$ *Mospab1* mutants. Genomic DNA was analyzed by PCR with primer pairs in (a).

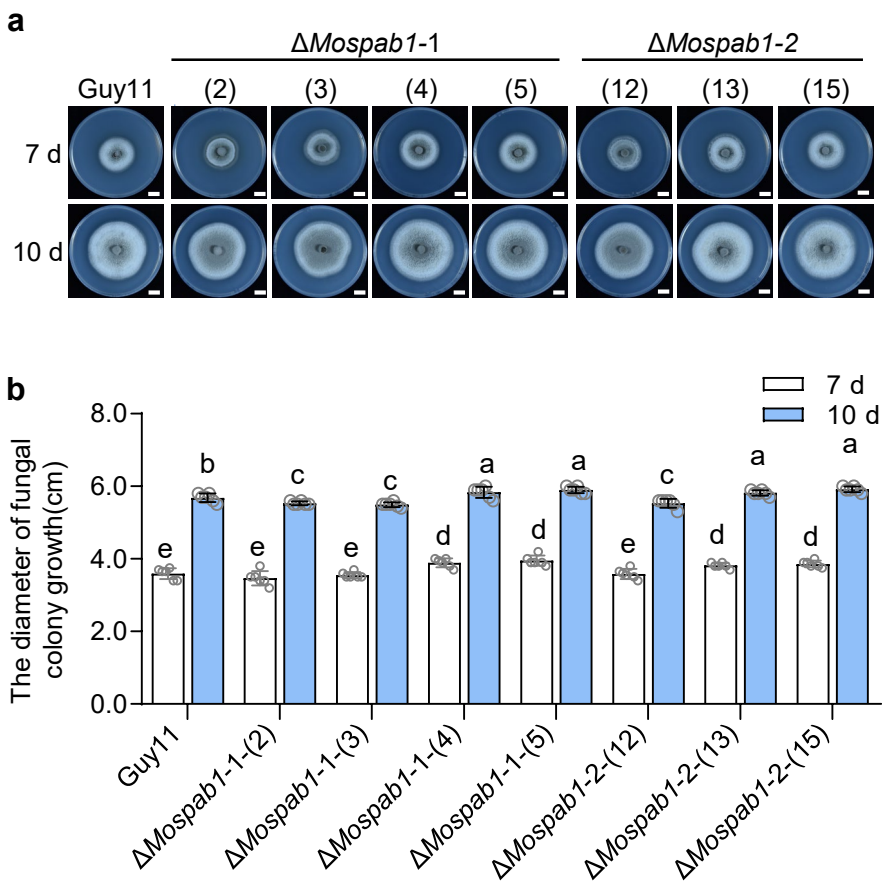

**Supplementary Fig. 6 Mycelial growth of Guy11 and the  $\Delta$ Mospab1 mutants on complete medium (CM).**

**a** Colonies of Guy11 and the  $\Delta$ Mospab1 mutants grown on CM plates for 7 and 10 days. Similar results are obtained from two independent biological experiments.

**b** Quantified diameters of colonies in (A). Bars represent mean  $\pm$  SD, n = 6 biologically independent samples (one-way ANOVA with two-sided least significant difference (LSD) test,  $P$  values are shown in the Source Data file). Different letters indicate significant differences ( $P < 0.05$ ). Source data are provided as a Source Data file.

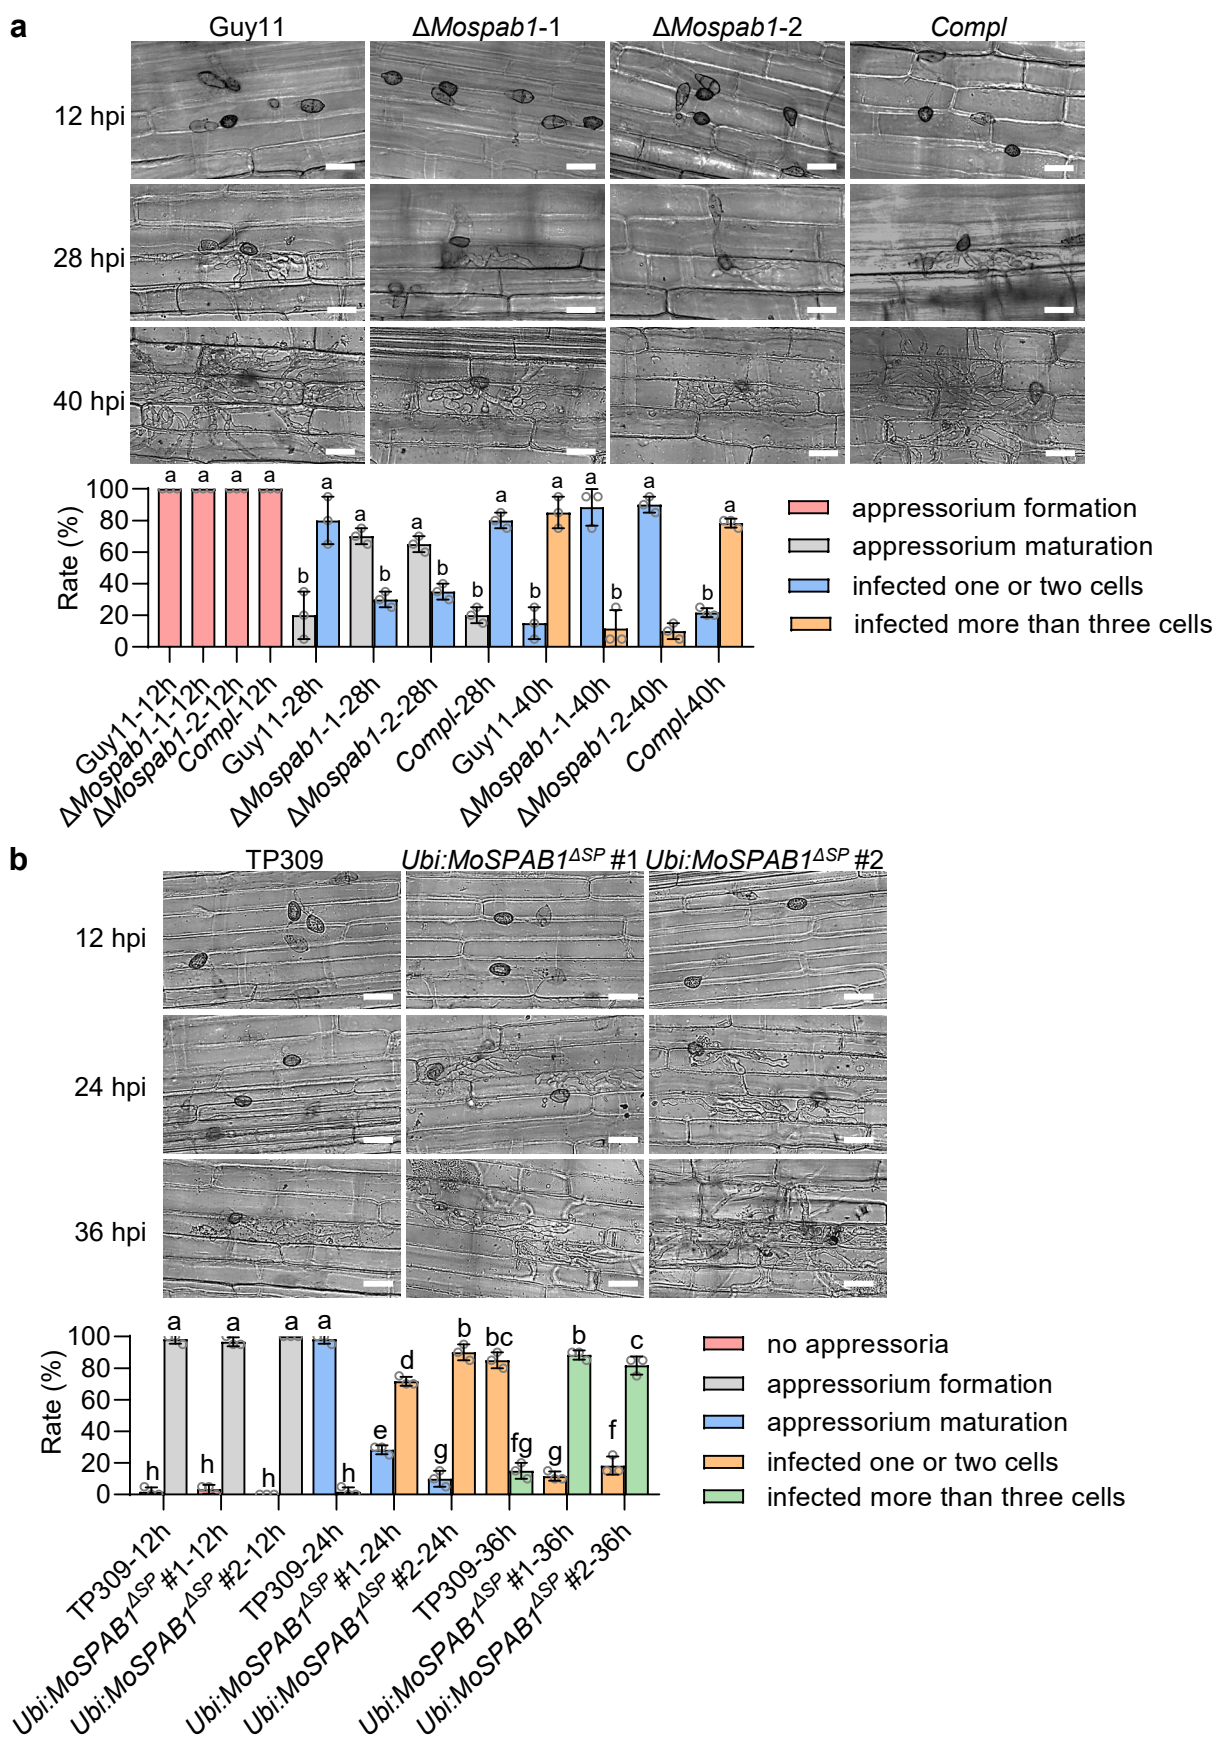

**Supplementary Fig. 7 Representative laser-scanning microscopic images of rice sheath cells infected by *M. oryzae*.**

**a** Representative laser-scanning microscopic images of TP309 sheath cells infected by Guy11,  $\Delta$ Mospab1, and a complemented strain individually (upper panel) and distribution of fungal infection progressing at 12, 28, and 40 hpi (lower panel). Scale bars, 20 $\mu$ m. **b** Representative laser scanning microscopic images of TP309 and *Ubi:MoSPAB1<sup>ASP</sup>* sheath cells infected by Guy11 (upper panel) and distribution of fungal infection progressing at 12, 24, and 36 hpi (lower panel). Scale bars, 20 $\mu$ m. In a and b, a total of 100 spores are counted. n= 3 independent experiments (one-way ANOVA with two-sided least significant difference (LSD) test, *P* values are shown in the Source Data file). Different letters indicate significant differences (*P* < 0.05). Source data are provided as a Source Data file.

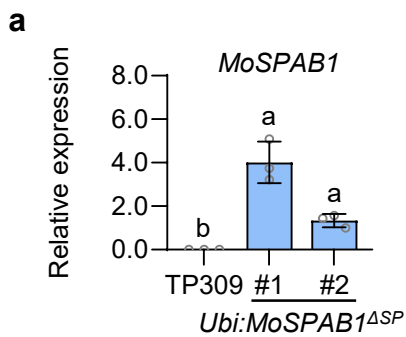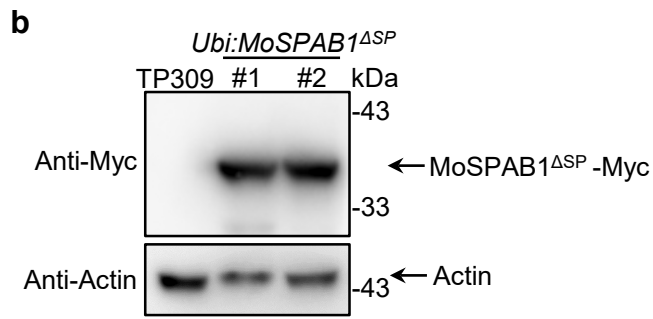

**Supplementary Fig. 8 Heterologous *MoSPAB1 $\Delta$ SP* expression in TP309 rice plants and detection of MoSPAB1 protein.**

**a** *MoSPAB1 $\Delta$ SP* RNA levels were measured by RT-qPCR. Bars represent mean  $\pm$  SD ( $n = 3$  biologically independent samples) and analyzed by one-way ANOVA with Dunnett T3's test.  $P$  values are shown in the Source Data file. Different letters indicate significant differences at  $P < 0.05$ . Source data are provided as a Source Data file.

**b** *MoSPAB1 $\Delta$ SP*-Myc fusion protein was detected by immunoblotting using an antibody against Myc. Actin was used as a loading control.



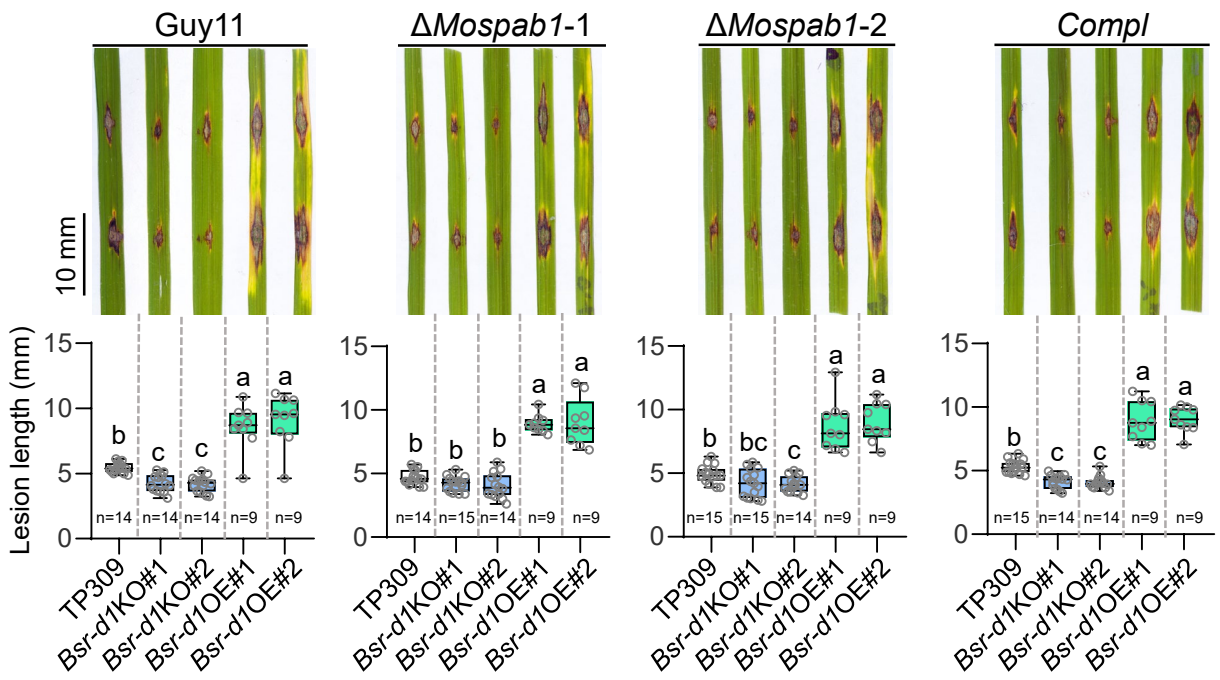

**Supplementary Fig. 9 Pathogenicity of *Guy11*, two  $\Delta Mospab1$  mutants, and a complemented strain on *Bsr-d1* transgenic lines in punch inoculation.**

Different *M. oryzae* strains were used to inoculate three-week-old leaves of *Bsr-d1KO* lines, *Bsr-d1OE* lines, and TP309. Photos of leaves with lesions were taken (upper panel) and lesion length quantified (lower panel) 6 dpi. This experiment was done three times. Different letters indicate significant differences at  $P < 0.05$ . Dunnett T3's multiple-comparison test with one-way ANOVA (mean  $\pm$  SD;  $n = 9\sim 15$  samples,  $n$  is shown in this figure).  $P$  values are shown in the Source Data file. Similar results are obtained from three independent biological experiments. Source data are provided as a Source Data file.

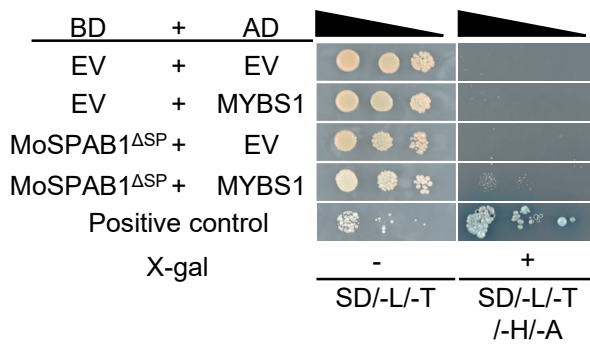

**Supplementary Fig. 10 Determination of the MoSPAB1-MYBS1 interaction using the yeast two-hybrid.**

Yeast cells containing two plasmids were diluted to 1×, 10×, and 100× with water and inoculated on SD/-L/-T and SD/-L/-T/-H/-A plates with X-gal added and grown at 28 °C for 2-4 days. SD/-L/-T represents a medium without leucine and tryptophan. SD/-L/-T/-H/-A represents a medium without leucine, tryptophan, histidine, and adenine. pGBKT7-53 and pGADT7-T were used as the positive control. Similar results are obtained from three independent biological experiments.

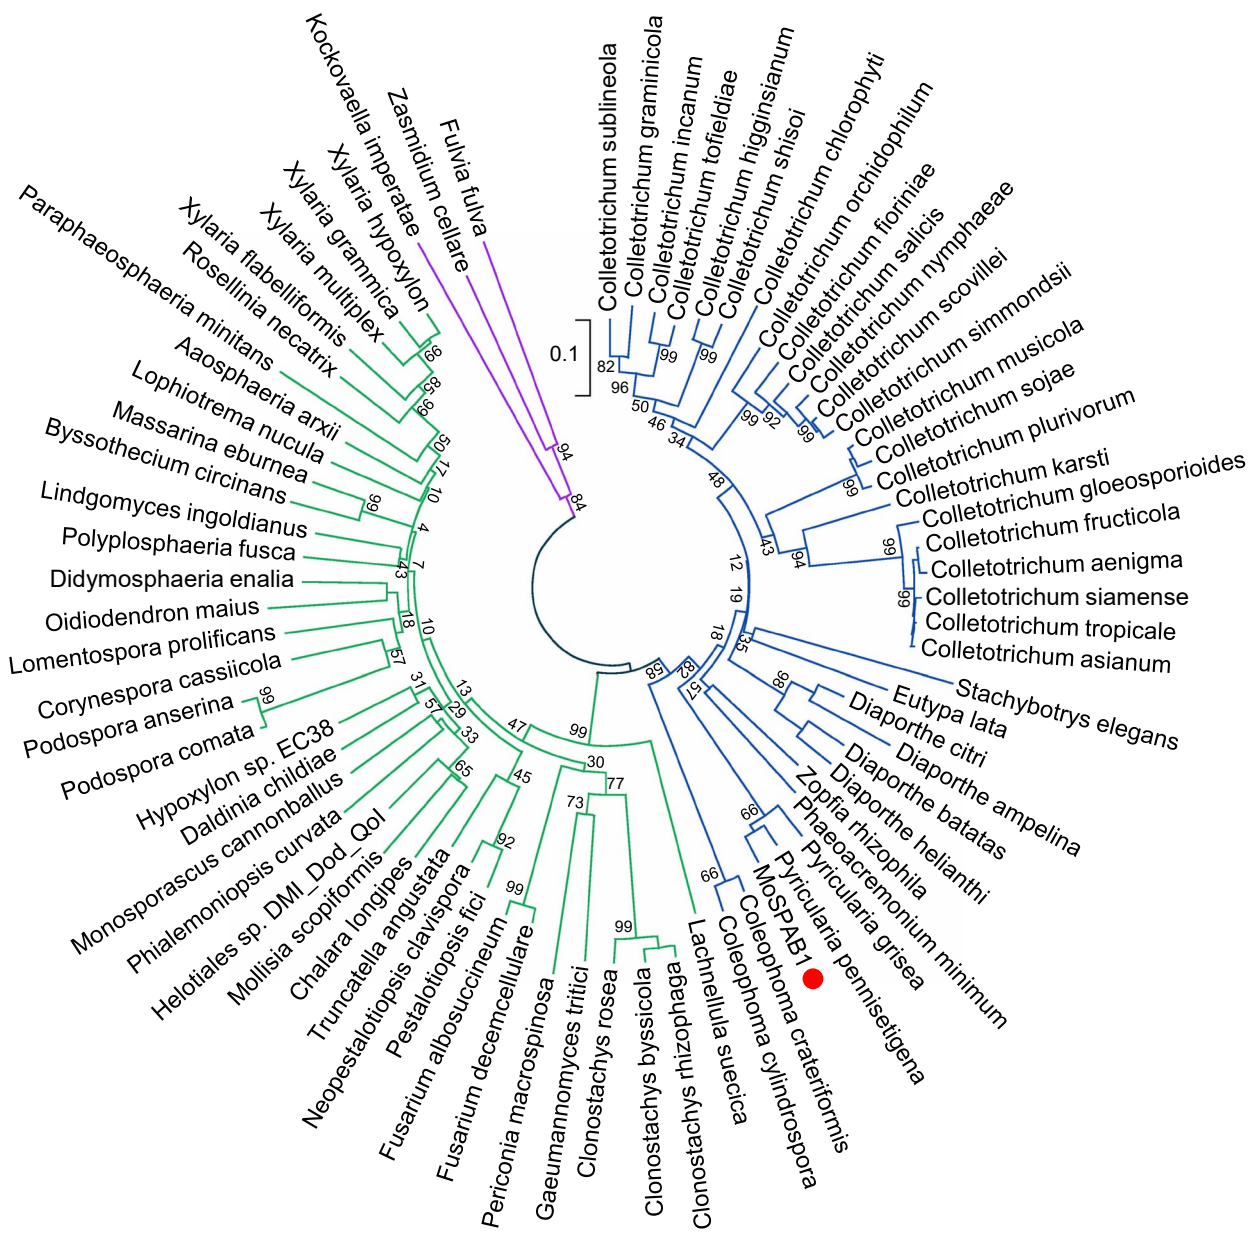

**Supplementary Fig. 11 Phylogenetic relationship of MoSPAB1 homologous proteins from fungi.** MEGA-X was used to construct the phylogenetic tree. Bootstrap values from 1,000 replicates were used to assess the robustness of the tree.

20 40 60 80 100

27<sup>th</sup>-47<sup>th</sup>

MoSPAB1 -----MLFTPIRS---GLASLLALAS---CAVAQNVKAIYLFKDVMSDTHAKTSGFDTVLLRFRIILPNADLVYVSTGSDG 72

Y34 -----MLFTPIRS---GLASLLALAS---CAVAQNVKAIYLFKDVMSDTHAKTSGFDTVLLRFRIILPNADLVYVSTGSDG 72

PoMZ -----MLFTPIRS---GLASLLALAS---CAVAQNVKAIYLFKDVMSDTHAKTSGFDTVLLRFRIILPNADLVYVSTGSDG 72

PspL5 -----MLFTPIRS---GLASLLALAS---CAVAQDVKAIYLFKDVMSDTHAKTSGFDTVLLRFRIILPNADLVYVSTGSDG 72

PpBr36 -----MLFTSTRS---GLASLLALAS---CAVAQNVKAIYLFKDVMSDTHAKTSGFDTVLLRFRIILPNADLVYVSTGSDG 72

PgN1 -----MLFTPIRA---GLASLLALAS---CAVAQNVKAIYLFKDVMSDTHAKTSGFDTVLLRFRIILPNADLVYVSTGSDG 72

CFIO01 -----MGASKEISLCLTIVWVLL---LFVN---TAVAAGVKSIYLFKDVLSNTTAKTSGFDTVLLRFRIILPNADLVYVSTGSDG 76

CSUB01 -----MNNWTLNRLAIYVVFALLLHG-SLLVYA---AAAANTVKSIFLFDKVLQSDTTHAKTSGFDSLVIRFRIILVLENGDLVYVSTGGAG 80

HER10 -----MMGVYKRTGLCLTITWVLLS---LFAN---AAAAAGVKSIYLFKDVLSNTTAKTSGFDTVLLRFRIILVLENGDLVYVSTGGAG 77

JM77 -----MGYKRTGLCLTITWVLLS---LFAN---AAAAAGVKSIYLFKDVLSNTTAKTSGFDTVLLRFRIILVLENGDLVYVSTGGAG 77

CSIM01 -----MMGVFKRTGLCLTITWVLLS---LFAN---AAAAAGVKSIYLFKDVLSNTTAKTSGFDTVLLRFRIILVLENGDLVYVSTGGAG 77

CORC01 -----MMGGFKRFGLYTLAWTLTICIHVPFILAY---AAADTVKSIYLFKDVLSNTTAKTSGFDTVLLRFRIILVLENGDLVYVSTGGAG 82

CkaCkLH20 -----MYALRNLRTRVATQALLTLFISTTVF---AQTNQNVKSIYLFKDVLSNTTAKTSGFDTVLLRFRIILVLENGDLVYVSTGGAG 81

CSAL01 -----MGVFGIGLCLTITWVLLS---LFAD---AAAAAGVKSIYLFKDVLSNTTAKTSGFDTVLLRFRIILVLENGDLVYVSTGGAG 76

CNYM01 -----MMGVSKGTGLCLTITWVLLS---LFAN---AAAAAGVKSIYLFKDVLSNTTAKTSGFDTVLLRFRIILVLENGDLVYVSTGGAG 77

CGCTS75 -----MRDSVKATVYARIYVVFALILAPLLAS---CQSDGNVKSIIYLFKDVLSNTSALKTAGFTLLRFRIILVLENGDLVYVSTGGAG 81

C1238 -----MKRWTNLFATIVVLLLHG-SRIVY---ATADTNKSIYLFKDVLSNTTAKTSGFDSLVIRFRIILVLENGDLVYVSTGGAG 79

CGSCA4 -----MRDSVNETLARIYVVFALILAPLLAS---CQSDGNVKSIIYLFKDVLSNTSALKTAGFTLLRFRIILVLENGDLVYVSTGGAG 81

CGG54 -----MRDSVKATVARIYVVFALIFSPLLAS---CQSDGNVKSIIYLFKDVLSNTSALKTAGFTLLRFRIILVLENGDLVYVSTGGAG 81

CGCSA5 -----MRDSVKATVARIYVVFALILAPLLAS---CQSDGNVKSIIYLFKDVLSNTSALKTAGFTLLRFRIILVLENGDLVYVSTGGAG 81

CGCS363 -----MRDLVKATVARIYVVFALILAPLQAL---CQSDGNVKSIIYLFKDVLSNTSALKTAGFTLLRFRIILVLENGDLVYVSTGGAG 81

Q607 -----MPDSVKATVARIYVVFALILAPLLAS---CQSDGNVKSIIYLFKDVLSNTSALKTAGFTLLRFRIILVLENGDLVYVSTGGAG 81

CT0861 -----MKRWANLFLAITVLLLHG-PLFVY---AAANTVKSIFLFDKVLQSDTTHAKTSGFDSLVIRFRIILVLENGDLVYVSTGGAG 79

K469DRAFT -----MPFKMGGVYALACALLFAP---FIPG---IFFKDVMSDTHAKTSGFDTVLLRFRIILVLENGDLVYVSTGGAG 67

CGLO -----MRDSVKATVARIYVVFALIFAPLLAS---CQSDGNVKSIIYLFKDVLSNTSALKTAGFTLLRFRIILVLENGDLVYVSTGGAG 81

CGMCC -----MRDFVKATVARIYVVFALILAPLQAL---CQSDGNVKSIIYLFKDVLSNTSALKTAGFTLLRFRIILVLENGDLVYVSTGGAG 81

UCRPA7 -----MGSHVIIRAILLTLFICHPWAT---IAESEKSIYLFKDVLSNTTAKTSGFDTVLLRFRIILVLENGDLVYVSTGGAG 75

CGCA056 -----MRDFVKATVARIYVVFALILAPLKA---CQSDGNVKSIIYLFKDVLSNTSALKTAGFTLLRFRIILVLENGDLVYVSTGGAG 81

CH63R -----MKRWINLN---RLVLAALVYG-PLIWA---AADTNKSIYLFKDVLSNTTAKTSGFDSLVIRFRIILVLENGDLVYVSTGGAG 76

CH35J -----MKRWINLN---RLVLAALVYG-PLIWA---AADTNKSIYLFKDVLSNTTAKTSGFDSLVIRFRIILVLENGDLVYVSTGGAG 76

GLRG -----MYWTLNRLAVALLVYVALLYG-SLLIHW---AADTVKSIYLFKDVLSNTTAKTSGFDSLVIRFRIILVLENGDLVYVSTGGAG 78

CHSISOI -----MKRWTSLN---CLVLTLYYG-PLIWA---AADTNKSIYLFKDVLSNTTAKTSGFDSLVIRFRIILVLENGDLVYVSTGGAG 76

CCHL11 MPTPTFVLFTAHLFANMKNLMNVG-FRALAALFLFS-PFLGLPFAHAANTVKSIFLFDKVLQSDTTHAKTSGFDTVLLRFRIILVLENGDLVYVSTGGAG 98

INS49 -----MLWYGLAHTLSSLLFS---VNAATTAIFLFDKVLQSDTTHAKTSGFDTVLLRFRIILVLENGDLVYVSTGGAG 72

KVR01 -----MLWRDFVAHSSTLLFAAFS---PVAS-TVIFLFDKVLQSDTTHAKTSGFDTVLLRFRIILVLENGDLVYVSTGGAG 72

DHEL01 -----MLWPKFAYTLLSTLLFVASS---NPVSASTVIFLFDKVLQSDTTHAKTSGFDTVLLRFRIILVLENGDLVYVSTGGAG 75

CPUI01 -----SFLPLCLLQFQAAL---GQTAANVKSIIYLFKDVLSNTTAKTSGFDTVLLRFRIILVLENGDLVYVSTGGAG 72

B0135DRAFT -----MQLFPKLGRTLLGLLATSLEYIT---TVAADYSKAIYLFKDVMSDTHAKTSGFDTVLLRFRIILVLENGDLVYVSTGGAG 77

CMUS01 -----MR-----SFLPLCLLQFQAAL---GQAANVKSIIYLFKDVLSNTTAKTSGFDTVLLRFRIILVLENGDLVYVSTGGAG 72

CSOJ01 -----MR-----RFLSLLCLLQFQAAL---GQAANVKSIIYLFKDVLSNTTAKTSGFDTVLLRFRIILVLENGDLVYVSTGGAG 72

UCREL1 -----MWLKSPLSGILLASVAEA---AAEATSVRSIFLFDKVLQSDTTHAKTSGFDTVLLRFRIILVLENGDLVYVSTGGAG 74

BP5796 -----MHLLSKTLKAVLWSSLFLS---SVFASDGLKPIYLFKDVLSNTTAKTSGFDTVLLRFRIILVLENGDLVYVSTGGAG 74

BP6252 -----MYLLSKALQAVLWSSLFLS---SVFASDGLKPIYLFKDVLSNTTAKTSGFDTVLLRFRIILVLENGDLVYVSTGGAG 74

UCDDA912 -----MLWHGWHALLPTLLFAVSN---FVNAASTTAIFLFDKVLQSDTTHAKTSGFDTVLLRFRIILVLENGDLVYVSTGGAG 74

LSUE1 -----MKSYTLAALGLLPHCASAP---SATTSGIRSIYLFKDVLSNTTAKTSGFDSLVIRFRIILVLENGDLVYVSTGGAG 74

120 140 160 180 200

103<sup>rd</sup>-123<sup>rd</sup> 137<sup>th</sup>-191<sup>st</sup>

MoSPAB1 NPVDWPVVTNGSYVGGQALTDKITSKLTAP---TLIRRVBVSLSVSHDITFQVIRDRIAADG-FGASTHLYRAFVDVLRKQTELDLDAFNNDDESYYVHPSTV 167

Y34 NPVDWPVVTNGSYVGGQALTDKITSKLTAP---TLIRRVBVSLSVSHDITFQVIRDRIAADG-FGASTHLYRAFVDVLRKQTELDLDAFNNDDESYYVHPSTV 167

PoMZ NPVDWPVVTNGSYVGGQALTDKITSKLTAP---TLIRRVBVSLSVSHDITFQVIRDRIAADG-FGASTHLYRAFVDVLRKQTELDLDAFNNDDESYYVHPSTV 167

PspL5 NPVDWPVVTNGSYVGGQALTDKIIISKLTAP---TLIRRVBVSLSVSHDITFQVIRDRIAADG-FGASTHLYRAFVDVLRKQTELDLDAFNNDDESYYVHPSTV 167

PpBr36 NPVDWPVVTNGSYVGGQALTDKIIISKLTAP---TLIRRVBVSLSVSHDITFQVIRDRIAADG-FGASTHLYRAFVDVLRKQTELDLDAFNNDDESYYVHPSTV 167

PgN1 NPVDWPVVTNGSYVGGQALTDKIILYKLTAP---TLIRRVBVSLSVSHDITFQVIRDRIAADG-FGASTHLYRAFVDVLRKQTELDLDAFNNDDESYYVHPSTV 167

CFIO01 EAVDAPVVTNGSYVGGTALAEKVKFSKTKT---TINIRVBVSLSVSHDITFQVIRDLINADG-FGSDTYLYRNFELKTEADLDAFNNDDEGYYVDVSTV 171

CSUB01 EAVDAPVVTNGSYVGGTALAEKVKFSKTKT---TINIRVBVSLSVSHDITFQVIRDLINADG-FGSDTYLYRNFELKTEADLDAFNNDDEGYYVDVSTV 175

HER10 EAVDAPVVTNGSYVGGTALAEKVKFSKTKT---TINIRVBVSLSVSHDITFQVIRDLINADG-FGSDTYLYRNFELKTEADLDAFNNDDEGYYVDVSTV 172

JM77 EAVDAPVVTNGSYVGGTALAEKVKFSKTKT---TINIRVBVSLSVSHDITFQVIRDLINADG-FGSDTYLYRNFELKTEADLDAFNNDDEGYYVDVSTV 171

CSIM01 EAVDAPVVTNGSYVGGTALAEKVKFSKTKT---TINIRVBVSLSVSHDITFQVIRDLINADG-FGSDTYLYRNFELKTEADLDAFNNDDEGYYVDVSTV 172

CORC01 DAVDAPVVTNGSYVGGTALAEKIKFSKTKT---TINIRVBVSLSVSHDITFQVIRDLINADG-FGSDTYLYRNFELKTEADLDAFNNDDEGYYVDVSTV 177

CkaCkLH20 EAVDAPVVTNGSYVGGDLSEKIQSFKTKT---TINIRVBVSLSVSHDITFQVIRDLINADG-FGSDTYLYRNFELKTEADLDAFNNDDEGYYVDVSTV 176

CSAL01 EAVDAPVVTNGSYVGGTALAEKIKFSKTKT---TINIRVBVSLSVSHDITFQVIRDLINADG-FGSDTYLYRNFELKTEADLDAFNNDDEGYYVDVSTV 171

CNYM01 EAVDAPVVTNGSYVGGTALAEKIKFSKTKT---TINIRVBVSLSVSHDITFQVIRDLINADG-FGSDTYLYRNFELKTEADLDAFNNDDEGYYVDVSTV 172

CGCTS75 EAVDAPVVTAGSYVGGEALSEKIRSFKTKT---THINIRVBVSLSVSHDITFQVIRSLINSNG-FGSDSYLYRNFELKTEADLDAFNNDDESYYVDVSTV 176

C1238 EAVDAPVVTAGSYVGGTALAEKIKFSKTKT---TINIRVBVSLSVSHDITFQVIRDLINADG-FGSDTYLYRNFELKTEADLDAFNNDDEGYYVDVSTV 174

CGSCA4 EAVDAPVVTAGSYVGGEALSEKIRSFKTKT---THINIRVBVSLSVSHDITFQVIRSLINSNG-FGSDSYLYRNFELKTEADLDAFNNDDESYYVDVSTV 176

CGG54 EAVDAPVVTAGSYVGGEALSEKIRSFKTKT---THINIRVBVSLSVSHDITFQVIRSLINSNG-FGSDSYLYRNFELKTEADLDAFNNDDESYYVDVSTV 176

CGCSA5 EAVDAPVVTAGSYVGGEALSEKIRSFKTKT---THINIRVBVSLSVSHDITFQVIRSLINSNG-FGSDSYLYRNFELKTEADLDAFNNDDESYYVDVSTV 176

CGCS363 EAVDAPVVTAGSYVGGEALSEKIRSFKTKT---THINIRVBVSLSVSHDITFQVIRSLINSNG-FGSDSYLYRNFELKTEADLDAFNNDDESYYVDVSTV 176

Q607 EAVDAPVVTAGSYVGGTALAEKIKFSKTKT---TINIRVBVSLSVSHDITFQVIRDLINADG-FGSDTYLYRNFELKTEADLDAFNNDDEGYYVDVSTV 176

CT0861 EAVDAPVVTAGSYVGGTALAEKIKFSKTKT---TINIRVBVSLSVSHDITFQVIRDLINADG-FGSDTYLYRNFELKTEADLDAFNNDDEGYYVDVSTV 174

K469DRAFT EAVDAPVVTAGSYVGGTALANKIKFSKTKT---TISIRVBVSLSVSHDITFQVIRDLINADG-FGSDTYLYRNFELKTEADLDAFNNDDESYYVDVSTV 162

CGLO EAVDAPVVTAGSYVGGEALSEKIRSFKTKT---THINIRVBVSLSVSHDITFQVIRSLINSNG-FGSDSYLYRNFELKTEADLDAFNNDDESYYVDVSTV 176

CGMCC EAVDAPVVTAGSYVGGEALSEKIRSFKTKT---THINIRVBVSLSVSHDITFQVIRDLINADG-FGSDTYLYRNFELKTEADLDAFNNDDEGYYVDVSTV 176

UCRPA7 EAVDAPVVTAGSYVGGTALAEKIKFSKTKT---TRIDRVBVSLSVSHDITFQVIRSLINSNG-FGSDTYLYRNFELKTEADLDAFNNDDESYYVDVSTV 170

CGCA056 EAVDAPVVTAGSYVGGEALSEKIRSFKTKT---THINIRVBVSLSVSHDITFQVIRSLINSNG-FGSDSYLYRNFELKTEADLDAFNNDDEGYYVDVSTV 176

CH63R EAVDAPVVTNGSYVGGVALADKIKFSKTKT---TINIRVBVSLSVSHDITFQVIRDLINADG-FGSDTYLYRNFELKTEADLDAFNNDDEGYYVDVSTV 171

CH35J EAVDAPVVTNGSYVGGVALADKIKFSKTKT---TINIRVBVSLSVSHDITFQVIRDLINADG-FGSDTYLYRNFELKTEADLDAFNNDDEGYYVDVSTV 171

GLRG EAVDAPVVTNGSYVGGVALADKIKFSKTKT---TYINIRVBVSLSVSHDITFQVIRDLINADG-FGSDTYLYRNFELKTEADLDAFNNDDEGYYVDVSTV 173

CHSISOI EAVDAPVVTNGSYVGGTALAEKIKFSKTKT---TINIRVBVSLSVSHDITFQVIRDLINADG-FGSDTYLYRNFELKTEADLDAFNNDDEGYYVDVSTV 171

CCHL11 EAVDAPVVTNGSYVGGTALAEKIKFSKTKT---TINIRVBVSLSVSHDITFQVIRDLINADG-FGSDTYLYRNFELKTEADLDAFNNDDESYYVDVSTV 193

INS49 EAVDAPVVTAGSYVGGVALADKIKFSKTKT---TLIRRVBVSLSVSHDITFQVIRDLINADG-FGSDTYLYRNFELKTEADLDAFNNDDESYYVDVSTV 167

KVR01 EAVDAPVVTAGSYVGGVALADKIKFSKTKT---TLIRRVBVSLSVSHDITFQVIRDLINADG-FGSDTYLYRNFELKTEADLDAFNNDDESYYVDVSTV 167

DHEL01 EAVDAPVVTAGSYVGGVALADKIKFSKTKT---TLIRRVBVSLSVSHDITFQVIRDLINADG-FGSDTYLYRNFELKTEADLDAFNNDDESYYVDVSTV 170

CPUI01 EPVDAPVVTAGSYVGGDALAEKIKFSKTKT---TDVDRVBVSLSVSHDITFQVIRALVAARS-T---VLRDGFALAKTEADLDAFNNDDESYYVDVSTV 163

B0135DRAFT EPVDAPVVTAGSYVGGDALAEKIKFSKTKT---TLVBRVBVSLSVSHDITFQVIRDLINADG-FGSDTYLYRNFELKTEADLDAFNNDDESYYVDVSTV 172

CMUS01 EPVDAPVVTAGSYVGGDALAEKIKFSKTKT---TDVDRVBVSLSVSHDITFQVIRALVADGGS-T---VLRDGFALAKTEADLDAFNNDDESYYVDVSTV 163

CSOJ01 EPVDAPVVTAGSYVGGDALAEKIKFSKTKT---TDVDRVBVSLSVSHDITFQVIRDLINADG-FGSDTYLYRNFELKTEADLDAFNNDDESYYVDVSTV 163

UCREL1 EAVDAPVVTAGSYVGGVALADKIKFSKTKTGGAT---TLIRRVBVSLSVSHDITFQVIRDLINADG-FGSDTYLYRNFELKTEADLDAFNNDDESYYVDVSTV 174

BP5796 QAVTITAVSNAGSYVGGVALADKIKFSKTKT---TIVNIRVBVSLSVSHDITFQVIRDLINADG-FGSDTYLYRNFELKTEADLDAFNNDDESYYVDVSTV 169

BP6252 QAVTITAVSNAGSYVGGVALADKIKFSKTKT---TIVNIRVBVSLSVSHDITFQVIRDLINADG-FGSDTYLYRNFELKTEADLDAFNNDDESYYVDVSTV 169

UCDDA912 DAVDAPVVTAGSYVGGVALADKIKFSKTKT---TLIRRVBVSLSVSHDITFQVIRDLINADG-FGSDTYLYRNFELKTEADLDAFNNDDESYYVDVSTV 152

LSUE1 -SSDVLTIASNSYVGGVALADKIKFSKTKT---TGIRNIRVBVSLSVSHDITFQVIRDLINADG-FGSDTYLYRNFELKTEADLDAFNNDDESYYVDVSTV 163

Supplementary Figure 12

137<sup>th</sup>-191<sup>st</sup>

207<sup>th</sup>-271<sup>st</sup>

220

240

260

280

300

|            |                                                                                                        |     |
|------------|--------------------------------------------------------------------------------------------------------|-----|
| MoSPAB1    | DFAQMLGLMGVRYSTAPYTNMNFADVQNRINASVPGLLDRHYLYOYDGGAAANNFGTWTOTRLG-MKIVFLVWVNDYKPDHGNTPAQAQTRBANNSQYN    | 266 |
| Y34        | DFAQMLGLMGVRYSTAPYTNMNFADVQNRINASVPGLLDRHYLYOYDGGAAANNFGTWTOTRLG-MKIVFLVWVNDYKPDHGNTPAQAQTRBANNSQYN    | 266 |
| PoMZ       | DFAQMLGLMGVRYSTAPYTNMNFADVQNRINAAVPGLLDRHYLYOYDGGAAANNFGTWTOTRLG-MKIVFLVWVNDYKPDHGNTPAQAQTRBANNSQYN    | 266 |
| PspLS      | DFAQMLGLMGVRYSTAPYTNMNFADVQNRINAAVPGLLDRHYLYOYDGGAAANNFGTWTOTRLG-MKIVFLVWVNDYKPDHGNTPAQAQTRBANNSQYN    | 266 |
| PpBr36     | EFAQMLGLMGVRYSTAPYTNVSWFADVQNRINAAVPGLLDRHYLYOYDGGAAANNFGTWTOTRLG-MKIVFLVWVNDYKPDHGNTPAQAQTRBANNSQYN   | 266 |
| PgNI       | EFAKMLGLMGVRYSTAPYTNMNFADVQNRINAAVPGLLDRHYLYOYDGGAAANNFGTWTOTRLG-MKIVFLVWVNDYKPDHGNTPAQAQTRBANNSQYN    | 266 |
| CFIO01     | SFAHMLGEMGVQYSIAPYTNNSGFWANVRTQVESAKPGLFDRVYLYOYDGGAGNNFGTWTOTRLG-IKVIFLVWVNDYKPSOGTTAAQAQRRESFSSQYA   | 270 |
| CSUB01     | GFAQLGALGVRYSTAPYTNNSRFWATVKSQIDAAPGLFDRVYLYOYDGGAGNNFGTWTOTRLG-IKVIFLVWVNDYKPSOGTTAAQAQRRESFSSQYA     | 274 |
| HER10      | SFAQMLGKMGVQYSIAPYTNNSGFWANVRTQVESANPGLFDRVYLYOYDGGAGNNFGTWTOTRLG-MKIVFLVWVNDYKPSOGTTAAQAQRRESFSSQYA   | 271 |
| JMJ77      | SFAQMLGKMGVQYSIAPYTNNSGFWANVRTQVESTNPGFLFDRVYLYOYDGGAGNNFGTWTOTRLG-MKIVFLVWVNDYKPSOGTTAAQAQRRESFSSQYA  | 270 |
| CSIM01     | SFAQMLGKMGVQYSIAPYTNNSGFWANVRTQVESANPGLFDRVYLYOYDGGAGNNFGTWTOTRLG-MKIVFLVWVNDYKPSOGTTAAQAQRRESFSSQYA   | 271 |
| CORC01     | SFAQMLGEMGVQYSIAPYTNNSGFWANVKAQIDASAPGLFDRVYLYOYDGGAGNNFGTWTOTRLG-TKVIIFLVWVNDYKPSOGTTAAQAQRRESFSSQYA  | 276 |
| CkaCkLH20  | SFAQLLGTIGVRYSTAPYTNNSGFWANVRSQIEAASAPGLFDRVYLYOYDGGAGNNFGTWTOTRLG-MKVIIFLVWVNDYKPSOGVTPQAQEARBAGADTYE | 275 |
| CSAL01     | SFAQMLGEMGVQYSIAPYTNNSGFWANVRTQVESANPGLFDRVYLYOYDGGAGNNFGTWTOTRLG-MKIVFLVWVNDYKPSOGTTAAQAQRRESFSSQYA   | 270 |
| CNYM01     | SFAQMLGKMGVQYSIAPYTNNSGFWANVRSQIEAASAPGLFDRVYLYOYDGGAGNNFGTWTOTRLG-MKVIIFLVWVNDYKPSOGTTAAQAQRRESFSSQYA | 271 |
| CGCTS75    | SFAQLLGTIGVRYSTAPYTNNSGFWANVRSQIDAEAPGLFDRVYLYOYDGGAGNNFGTWTOTRLG-AKVIIFLVWVNDYKPSOGVTPDQAQGRSTEQQYD   | 275 |
| CI238      | MFAQLLGTIGVRYSTAPYTKSRFWANVRSQIDATVPGFLFDRVYLYOYDGGAGNNFGTWTOTRLG-IKVIFLVWVNDYKPSOGTTAAQAQRRESFSSQYA   | 273 |
| CGCSCA4    | SFARLLGTIGVRYSTAPYTNNSGFWANVRSQIDAEAPGLFDRVYLYOYDGGAGNNFGTWTOTRLG-AKVIIFLVWVNDYKPSOGVTPDQAQGRSTEQQYD   | 275 |
| CG654      | SFAHLLGTIGVRYSTAPYTNNSGFWANVRSQIDAEAPGLFDRVYLYOYDGGAGNNFGTWTOTRLG-IKVIFLVWVNDYKPSOGVTPDQAQGRSTEQQYD    | 275 |
| CGCSCA5    | SFAQLLGTIGVRYSTAPYTNNSGFWANVRSQIDAEAPGLFDRVYLYOYDGGAGNNFGTWTOTRLG-AKVIIFLVWVNDYKPSOGVTPDQAQGRSTEQQYD   | 275 |
| CGCS363    | SFAQLLGTIGVRYSTAPYTNNSGFWANVRSQIDAEAPGLFDRVYLYOYDGGAGNNFGTWTOTRLG-IKVIFLVWVNDYKPSOGVTPDQAQGRSTEQQYD    | 275 |
| GQ607      | SFAQLLGTIGVRYSTAPYTNNSGFWANVRSQIDAEAPGLFDRVYLYOYDGGAGNNFGTWTOTRLG-AKVIIFLVWVNDYKPSOGVTPDQAQGRSTEQQYD   | 275 |
| CT0861     | KFAQLLGTIGVRYSTAPYTNNSGFWANVRSQIDAEAPGLFDRVYLYOYDGGAGNNFGTWTOTRLG-IKVIFLVWVNDYKPSOGTTAAQAQRRESFSSQYA   | 271 |
| K469DRAFT  | SFAKMLGEMGVQYSITPVTNLNFWANVQDQINTAVPGLLDRHYLYOYDGGAGNNFGTWTOTRLG-IPVIFLVWVNDYKPSOGVTPAARAREBEGASEQYG   | 263 |
| CGLO       | SFAHLLGTIGVRYSTAPYTNNSGFWANVRSQIDAEAPGLFDRVYLYOYDGGAGNNFGTWTOTRLG-AKVIIFLVWVNDYKPSOGVTPDQAQGRSTEQQYD   | 275 |
| CGMCC      | SFAQLLGTIGVRYSTAPYTNNSGFWANVRSQIDAEAPGLFDRVYLYOYDGGAGNNFGTWTOTRLG-IKVIFLVWVNDYKPSOGVTPDQAQGRSTEQQYD    | 275 |
| UCRPA7     | SFATMLGTIGVRYSTAPYTNINFWANVRSQIDAEAPGLFDRVYLYOYDGGAGNNFGTWTOTRLG-MKISIFLVWVNDYKPSOGTTAAQAQTKSGVYTYA    | 269 |
| CGCA056    | SFAQLLGTIGVRYSTAPYTNNSGFWANVRSQIDAEAPGLFDRVYLYOYDGGAGNNFGTWTOTRLG-IKVIFLVWVNDYKPSOGVTPDQAQGRSTEQQYD    | 275 |
| CH63R      | AFARLLGVLGVQYSIAPYTNIEFWANVQDQINTAVPGLLDRHYLYOYDGGAGNNFGTWTOTRLG-IPVIFLVWVNDYKPSOGVTPAARAREBEGASEQYG   | 272 |
| CH35J      | AFARLLGVLGVQYSIAPYTNIEFWANVQDQINTAVPGLLDRHYLYOYDGGAGNNFGTWTOTRLG-IPVIFLVWVNDYKPSOGVTPAARAREBEGASEQYG   | 272 |
| GLRG       | AFARLLGALGVRYSTAPYTNNSGFWANVRSQIDAEAPGLFDRVYLYOYDGGAGNNFGTWTOTRLG-IKVIFLVWVNDYKPSOGVTPAQAQRRESFSSQYA   | 270 |
| CSHISOI    | AFARLLGALGVRYSTAPYTNNSGFWANVRSQIDAEAPGLFDRVYLYOYDGGAGNNFGTWTOTRLG-IPVIFLVWVNDYKPSOGVTPAARAREBEGASEQYG  | 270 |
| CCHL11     | SFAQLLGGDGVQYSIAPYTNNSNFWANVRSQIDAEAPGLFDRVYLYOYDGGAGNNFGTWTOTRLG-ISVIFLVWVNDYKPSOGTTNPAQAQRRESFSSQYA  | 292 |
| INS49      | SFAQLLGGDGVRYSTAPYTNNSNFWANVRSQIDAEAPGLFDRVYLYOYDGGAGNNFGTWTOTRLG-ISVIFLVWVNDYKPSOGTTNPAQAQRRESFSSQYA  | 262 |
| KVR01      | TFAKLLGEGVQYSIAPYTNIAFWANVRSQIDAEAPGLFDRVYLYOYDGGAGNNFGTWTOTRLG-LKVTIFLVWVNDYKPSOGVTPQAQAKBANNTQYA     | 262 |
| DHEL01     | TFAKLLGEGVQYSIAPYTNIAFWANVRSQIDAEAPGLFDRVYLYOYDGGAGNNFGTWTOTRLG-LKVTIFLVWVNDYKPSOGVTPQAQAKBANNTQYA     | 265 |
| CPLU01     | AFAEILGEGVQYSIAPYTNIAFWANVRSQIDAEAPGLFDRVYLYOYDGGAGNNFGTWTOTRLG-MKVIIFLVWVNDYKPSOGVTPQAQAKBANNTQYA     | 262 |
| BOI35DRAFT | DFALMLGEMGVQYSIAPYTNNSNFWANVRSQIDAEAPGLFDRVYLYOYDGGAGNNFGTWTOTRLG-MKIVIFLVWVNDYKPSOGVTPQAQAKBANNTQYA   | 262 |
| MUS01      | AFAEILGEGVQYSIAPYTNIAFWANVRSQIDAEAPGLFDRVYLYOYDGGAGNNFGTWTOTRLG-MKVIIFLVWVNDYKPSOGVTPQAQAKBANNTQYA     | 262 |
| CSOJ01     | AFAEILGEGVQYSIAPYTNIAFWANVRSQIDAEAPGLFDRVYLYOYDGGAGNNFGTWTOTRLG-MKVIIFLVWVNDYKPSOGVTPQAQAKBANNTQYA     | 262 |
| UCREL1     | AFAGMLGEGVQYSIAPYTNIAFWANVRSQIDAEAPGLFDRVYLYOYDGGAGNNFGTWTOTRLG-LKVTIFLVWVNDYKPSOGVTPQAQAKBANNTQYA     | 274 |
| BP5796     | KFAEMLGNIGVRYSTAPYTNLDFWASIGSSLNETNPGYLRALYLCVGGENNDPGEQDVLDM-KVIFLVWVNDYKPSOGVTPQAQAKBANNTQYA         | 268 |
| BP6252     | KFAEMLGNIGVRYSTAPYTNLDFWASIGSSLNETNPGYLRALYLCVGGENNDPGEQDVLDM-KVIFLVWVNDYKPSOGVTPQAQAKBANNTQYA         | 268 |
| UCDDA912   | SFAKLLGGDGVRYSTAPYTNNSNFWANVRSQIDAEAPGLFDRVYLYOYDGGAGNNFGTWTOTRLG-LKVTIFLVWVNDYKPSOGVTPQAQAKBANNTQYA   | 247 |
| LSUE1      | AFAKMLGEGVRYSTAPYTNNSNFWANVRSQIDAEAPGLFDRVYLYOYDGGAGNNFGTWTOTRLG-MKVIIFLVWVNDYKPSOGVTPQAQAKBANNTQYA    | 258 |

320

340

360

380

400

|            |                                                                                               |     |
|------------|-----------------------------------------------------------------------------------------------|-----|
| MoSPAB1    | LAGGGWVNDYDIEKLNSSYEYGGALTS-----VFQG-----                                                     | 298 |
| Y34        | LAGGGWVNDYDIEKLNSSYEYGGALTS-----VFQG-----                                                     | 298 |
| PoMZ       | LAGGGWVNDYDIEKLNSSYEYGGALTS-----VFQG-----                                                     | 298 |
| PspLS      | LAGGGWVNDYDIEKLNSSYEYGGALTSHPETGLEPNNVRLSKSNLPYYNTSNTTSRWEPPGTDTEKLGKQYMGKYSALLPSPSQAGQIRAAHL | 366 |
| PpBr36     | LAGGGWVNDYDIEKLNSSYEYGGALTS-----VFQG-----                                                     | 297 |
| PgNI       | LAGGGWVNDYDIEKLNSSYEYGGALTS-----VFQG-----                                                     | 298 |
| CFIO01     | VAGGGWVNDYDIEKMSSYTDYGALTS-----VF-----                                                        | 300 |
| CSUB01     | VAGGGWVNDYDIEKMSSYAEYAAALTS-----VFQ-----                                                      | 305 |
| HER10      | VAGGGWVNDYDIEKMSSYTDYGALTS-----VF-----                                                        | 301 |
| JMJ77      | VAGGGWVNDYDIEKMSSYTDYGALTS-----VF-----                                                        | 300 |
| CSIM01     | VAGGGWVNDYDIEKMSSYTDYGALTS-----VF-----                                                        | 301 |
| CORC01     | VAGGGWVNDYDIEKMSSYSDYGALTS-----VF-----                                                        | 306 |
| CkaCkLH20  | VAGGGWVNDYDIEKMSSYVEYAAALTD-----VFA-----                                                      | 306 |
| CSAL01     | VAGGGWVNDYDIEKMSSYVDYGALTS-----IF-----                                                        | 300 |
| CNYM01     | VVAGGGWVNDYDIEKMSSYTDYGALTS-----VF-----                                                       | 301 |
| CGCTS75    | VAGGGWVNDYDIEKMSSYEYGDALLT-----VFQ-----                                                       | 306 |
| CI238      | VAGGGWVNDYDIEKMSSYTEYGTALTS-----VFR-----                                                      | 304 |
| CGCSCA4    | VAGGGWVNDYDIEKMSSYEYGDALLT-----VFQ-----                                                       | 306 |
| CG654      | VAGGGWVNDYDIEKMSSYDEYGDALLT-----VFQ-----                                                      | 306 |
| CGCSCA5    | VAGGGWVNDYDIEKMSSYEYGDALLT-----VFQ-----                                                       | 306 |
| CGCS363    | VAGGGWVNDYDIEKMSSYEYGDALLT-----VFQ-----                                                       | 306 |
| GQ607      | VAGGGWVNDYDIEKMSSYEYGDALLT-----VFQ-----                                                       | 306 |
| CT0861     | VAGGGWVNDYDIEKMSSYTEYGTALTS-----VFQ-----                                                      | 304 |
| K469DRAFT  | VAGGGWVNDYDIEKMSSYTSYSGSLTS-----VFQEKTEGESPPVSM-----                                          | 303 |
| CGLO       | VAGGGWVNDYDIEKMSSYDEYGDALLT-----VFQ-----                                                      | 306 |
| CGMCC      | VAGGGWVNDYDIEKMSSYEYGDALLT-----VFQ-----                                                       | 306 |
| UCRPA7     | VAGGGWVNDYDIEKMSSYVEYGGVLT-----VFQ-----                                                       | 300 |
| CGCA056    | VAGGGWVNDYDIEKMSSYEYGDALLT-----VFQ-----                                                       | 306 |
| CH63R      | VAGGGWVNDYDIEKMSSYVEYAAALTD-----VFQ-----                                                      | 301 |
| CH35J      | VAGGGWVNDYDIEKMSSYVEYAAALTD-----VFQ-----                                                      | 301 |
| GLRG       | VAGGGWVNDYDIEKMSSYADYAAALAG-----VFQ-----                                                      | 303 |
| CSHISOI    | VAGGGWVNDYDIEKMSSYVEYAAALTD-----VFQ-----                                                      | 301 |
| CCHL11     | VAGGGWVNDYDIEKLGASDEYGGALTS-----VFQ-----                                                      | 323 |
| INS49      | VDEGGWVNDYDIEKMSSYTSYQAALTS-----VFQE-----                                                     | 294 |
| KVR01      | VDEGGWVNDYDIEKMSSYTAAYQAITN-----VFPA-----                                                     | 294 |
| DHEL01     | VDEGGWVNDYDIEKMSSYASAYQAALTN-----VFPA-----                                                    | 297 |
| CPLU01     | VAGGGWVNDYDIEKMSSYDEYAGALVS-----VFQ-----                                                      | 293 |
| BOI35DRAFT | LDVAGWVNDYDIEKMSSYDDYAGVLS-----IFG-----                                                       | 302 |
| MUS01      | VAGGGWVNDYDIEKMSSYDEYAGALVS-----VFQ-----                                                      | 293 |
| CSOJ01     | VAGGGWVNDYDIEKMSSYDEYAGALVR-----VFQ-----                                                      | 293 |
| UCREL1     | VAGGGWVNDYDIEKMSSYDAYGGVLT-----IFQ-----                                                       | 305 |
| BP5796     | VAGGGWVNDYDIEKMSSYTYADALLD-----VFQ-----                                                       | 299 |
| BP6252     | VAGGGWVNDYDIEKMSSYTYADALLD-----VFQ-----                                                       | 299 |
| UCDDA912   | VDEGGWVNDYDIEKSSYVSLPVTLYK-----RSQ-----                                                       | 267 |
| LSUE1      | LAGGGWVNDYDIEKLGSSYIAPSENLSPPCCRRASIVQR-----TFLANVQLKHESGLIILE-----                           | 317 |

Supplementary Figure 12 continued

**Supplementary Fig. 12 Sequence alignment of MoSPAB1 and homologous proteins.**

Regions of amino acids 27-47, 103-123, 137-191, and 207-271 were labeled with red boxes. Shades from dark to light indicate similarity degrees of 100%, 80%, 60%, and less than 60%. Y34, the OOU\_Y34scaffold01081g from *Pyricularia oryzae* Y34; PoMZ, the PoMZ\_02865 from *Pyricularia oryzae*; PspLS, the PspLS\_09416 from *Pyricularia* sp. CBS 133598; PpBr36, the PpBr36\_02267 from *Pyricularia pennisetigena*; PgNI, the PgNI\_02481 from *Pyricularia grisea*; CFIO01, the CFIO01\_08786 from *Colletotrichum fiorinae* PJ7; CSUB01, the CSUB01\_11810 from *Colletotrichum sublineola*; HER10, the HER10\_EVM0008022 from *Colletotrichum scovillei*; JMJ77, the JMJ77\_0014689 from *Colletotrichum scovillei*; CSIM01, the CSIM01\_07887 from *Colletotrichum simmondsii*; CORC01, the CORC01\_09639 from *Colletotrichum orchidophilum*; CkaCkLH20, the CkaCkLH20\_04340 from *Colletotrichum karsti*; CSAL01, the CSAL01\_01070 from *Colletotrichum salicis*; CNYM01, the CNYM01\_12775 from *Colletotrichum nymphaeae* SA-01; CGCTS75, the CGCTS75\_v014773 from *Colletotrichum tropicale*; Cl238, the Cl238\_02416 from *Colletotrichum incanum*; CGCSCA4, the CGCSCA4\_v013087 from *Colletotrichum siamense*; GCG54, the GCG54\_00014612 from *Colletotrichum gloeosporioides*; CGCSCA5, the CGCSCA5\_v015001 from *Colletotrichum siamense*; CGCS363, the CGCS363\_v013914 from *Colletotrichum siamense*; GQ607, the GQ607\_014599 from *Colletotrichum asianum*; CT0861, the CT0861\_02089 from *Colletotrichum tofieldiae*; K469DRAFT, the K469DRAFT\_741528 from *Zopfia rhizophila* CBS 207.26; CGLO, the CGLO\_05580 from *Colletotrichum gloeosporioides* Cg-14; CGMCC, the CGMCC3\_g17995 from *Colletotrichum fructicola*; UCRPA7, the UCRPA7\_3110 from *Phaeoacremonium minimum* UCRPA7; CGCA056, the CGCA056\_v014942 from *Colletotrichum aenigma*; CH63R, the CH63R\_12215 from *Colletotrichum higginsianum* IMI 349063; CH35J, the CH35J\_009866 from *Colletotrichum higginsianum*; GLRG, the GLRG\_09307 from *Colletotrichum graminicola* M1.001; CSHISOI, the CSHISOI\_06683 from *Colletotrichum shisoi*; CCHL11, the CCHL11\_07208 from *Colletotrichum chlorophyte*; INS49, the INS49\_011234 from *Diaporthe citri*; KVR01, the KVR01\_009678 from *Diaporthe batatas*; DHEL01, the DHEL01\_v204942 from *Diapeliathinanthi*; CPLU01, the CPLU01\_12574 from *Colletotrichum plurivorum*; B0I35DRAFT, the B0I35DRAFT\_347999 from *Stachybotrys elegans*; CMUS01, the CMUS01\_16400 from *Colletotrichum musica*; CSOJ01, the CSOJ01\_1383 from *Colletotrichum sojae*; UCREL1, the UCREL1\_11766 from *Eutypa lata* UCREL1; BP5796, the BP5796\_12446 from *Coleophoma crateriformis*; BP6252, the BP6252\_13955 from *Coleophoma cylindrospora*; UCDDA912, the UCDDA912\_g02556 from *Diaporthe ampelina*; LSUE1, the LSUE1\_G003910 from *Lachnellula suecica*.

```

Bsr-d1 (+) -82 AATCATCCAC CGCTCGCT GCTGCTGCTA -55
              | | | | | | | | | |
SbBsr-d1 (+) -809 TGCACACAGT AGCTCGCT CGCGCACCTT -782

Bsr-d1 (+) -82 AATCATCCAC CGCTCGC-TGCTGCTGCTA -55
              | | | | | | | | | |
AcBsr-d1 (-) -159 GCTACATGAA TGCTTGTA CACTACATAT- -186

Motif          (C/A)(G/C)(C/G)T(T/C)G(C/A)(T/C)

```

**Supplementary Fig. 13 Conserved cis-motif (C/A)(G/C)(C/G)T(T/C)G(C/A)T bound by MoSPAB1 was found in *SbBsr-d1* and *AcBsr-d1* promoters.**  
 '+' and '-' behind the gene represent the sense and antisense strand, respectively.
