# Supplementary material for: Magnaporthe oryzae effector MoSPAB1 directly activates rice Bsr-d1 expression to facilitate pathogenesis
Source: PubMed Central journal article supplement (PMC10728069; doi:10.1038/s41467-023-44197-9), 2023-12-18
Supplement: 41467_2023_44197_MOESM3_ESM.pdf [file 41467_2023_44197_MOESM3_ESM.pdf]

## **Description of Additional Supplementary Files**

**Supplementary Data 1.** Primers used in this study
